# Supplementary material for: Ag@AuNP-Functionalized Capillary-Based SERS Sensing Platform for Interference-Free Detection of Glucose in Urine Using SERS Tags with Built-In Nitrile Signal
Source: MDPI journal article supplement (doi:10.3390/molecules28247939), 2023-12-05
Supplement: s1 [file s1]

## Supplementary Information for

### **Ag@AuNPs functionalized capillary-based SERS sensing platform for interference-free detection of glucose in urine by using SERS tags with built-in nitrile signal**

Yanmei Si <sup>1</sup>, Hua Wang <sup>2,\*</sup>, Yehao Yan <sup>3,\*</sup>, Bingwen Li <sup>4</sup>, Zeyun Ni <sup>4</sup>, Hongrui Shi <sup>4</sup>

<sup>1</sup> Institute of Forensic Medicine and Laboratory Medicine, Jining Medical University, Jining 272067, PR China.

<sup>2</sup> School of Life Science, Huzhou University, Huzhou, 313000, PR China.

<sup>3</sup> School of Public Health, Jining Medical University, Jining, Shandong, 272067, PR China.

<sup>4</sup> Shandong Key Laboratory of Biophysics, Institute of Biophysics, Dezhou University, Dezhou, 253023, P. R. China.

#### **Table of Content**

Figure S1. TEM and size distribution of AgNPs.

Figure S2. TEM and size distribution of Ag@AuNPs.

Figure S3. TEM and size distribution of Ag@MBN@AuNPs.

Figure S4 Energy spectrum of (A) Ag@AuNPs and (B) Ag@MBN@AuNPs.

Table S1 Energy spectrum quantification report.

Figure S5. UV-vis spectra of (A) AgNPs, (B) Ag@AuNPs and (C) Ag@MBN@AuNPs before and after treatment with H<sub>2</sub>O<sub>2</sub>.

Table S2 SERS bands assignment of SERS spectra observed in Figure. 2 and Figure. 3.

Figure S6. (A) UV-vis spectra of (A) Ag@AuNPs and (B) Ag@MBN@AuNPs before and after modified by MBA.

Figure S7. Photographs of aminosilylated capillary treated with Ag@AuNPs (a) and raw capillary treated with Ag@AuNPs (b).

Figure S8 Simulated near-field electromagnetic field distributions of the SERS sensing platform.

## Additional figures

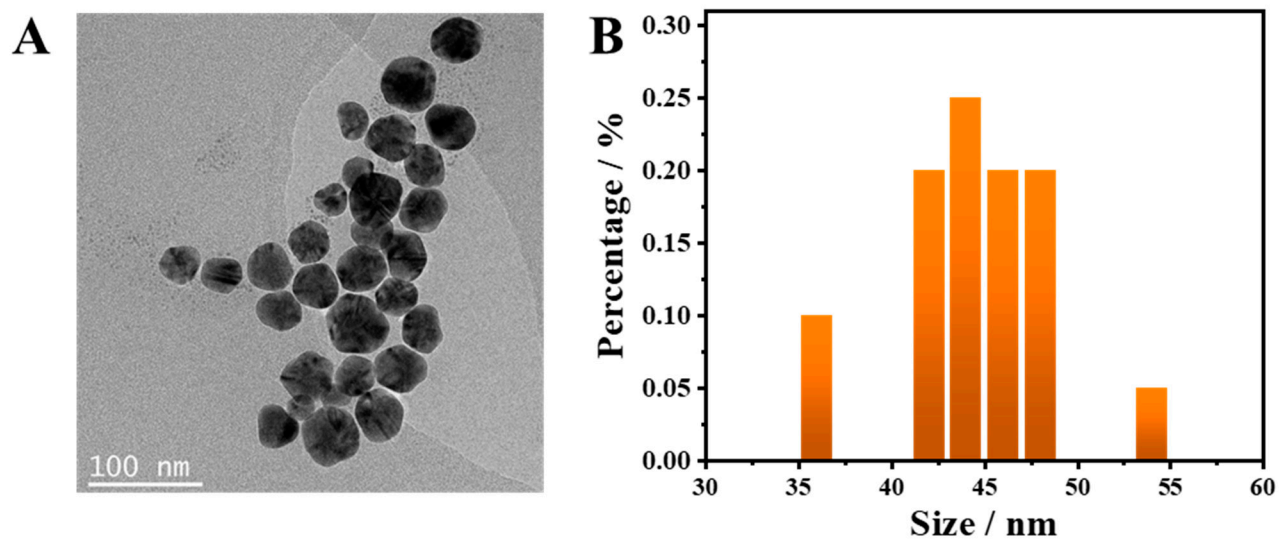

Figure S1 (A) TEM and (B) size distribution of AgNPs.

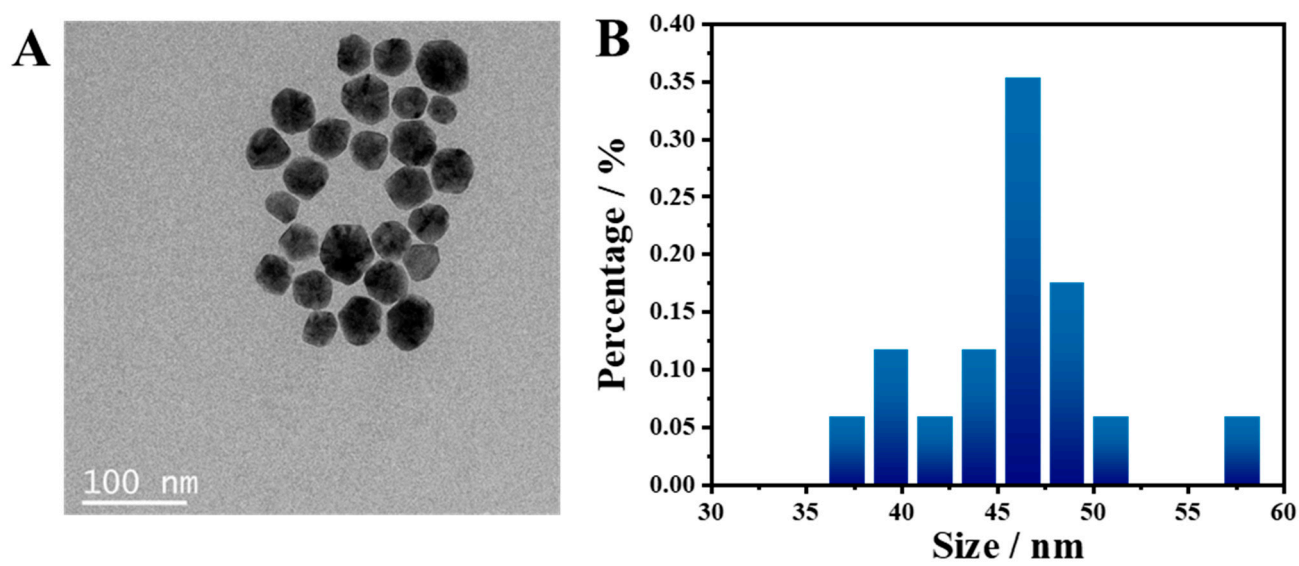

Figure S2 (A) TEM and (B) size distribution of Ag@AuNPs.

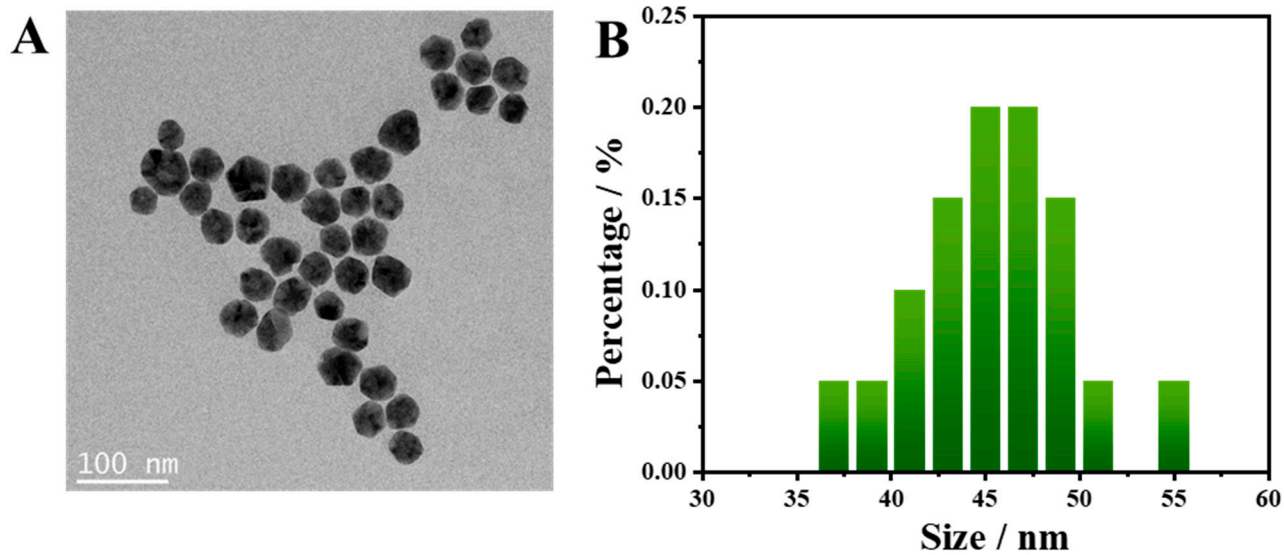

Figure S3 (A) TEM and (B) size distribution of Ag@MBN@AuNPs.

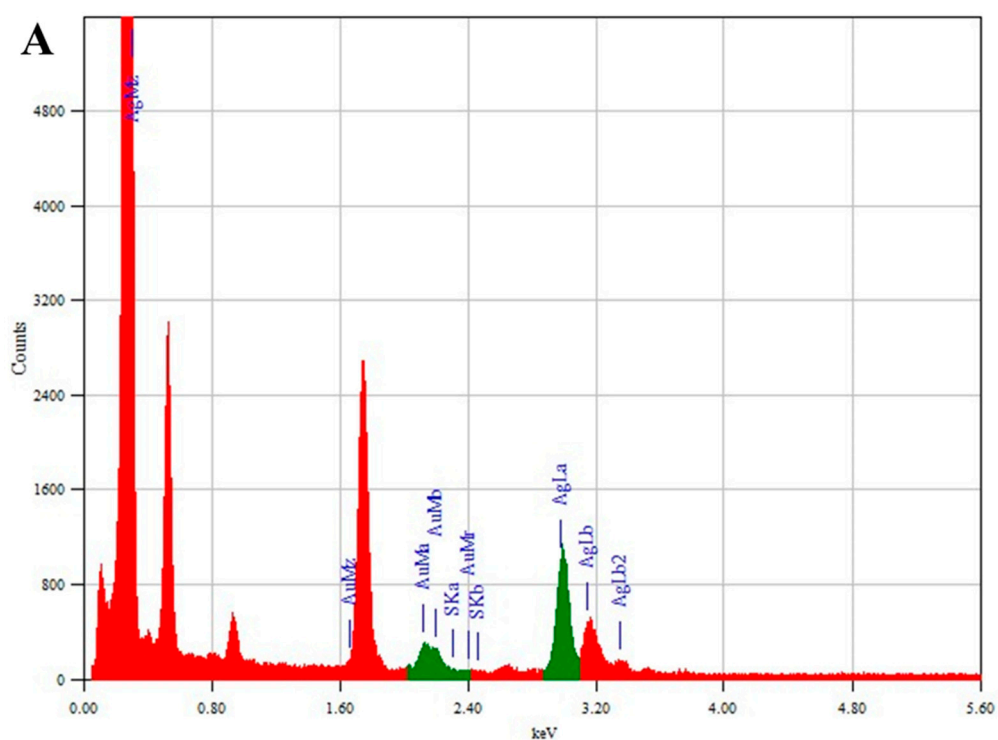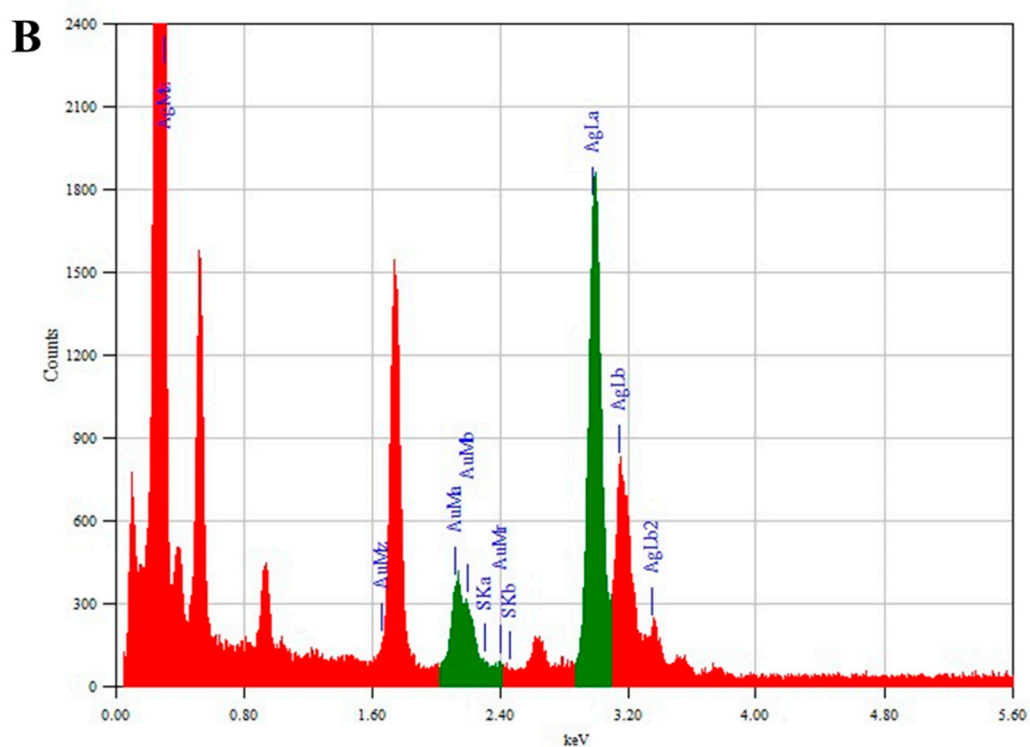

Figure S4 Energy spectrum of (A) Ag@AuNPs and (B) Ag@MBN@AuNPs.

Table S1 Energy spectrum quantification report.

|              | Ag (Mass%) | Au (Mass%) | S (Mass%) |
|--------------|------------|------------|-----------|
| Ag@AuNPs     | 87.28      | 12.72      | ND        |
| Ag@MBN@AuNPs | 88.39      | 11.52      | 0.09      |

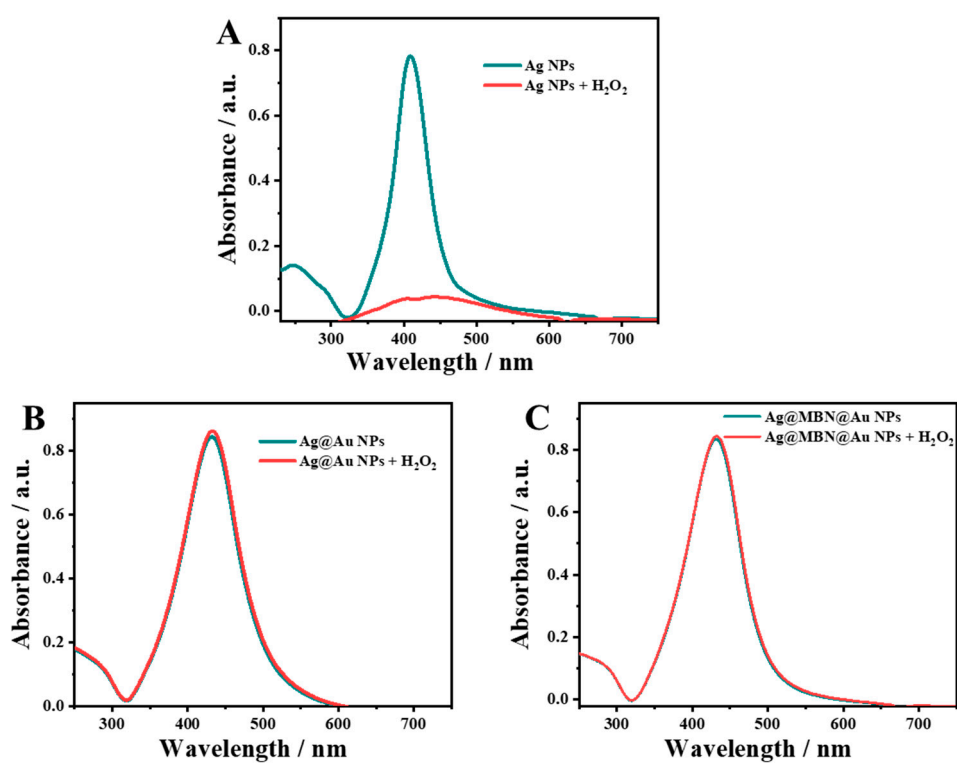

Figure S5. UV-vis spectra of (A) AgNPs, (B) Ag@AuNPs and (C) Ag@MBN@AuNPs before and after treatment with  $H_2O_2$ . (1mM).

Table S2 SERS bands assignment of SERS spectra observed in Fig 2 and Fig 3.<sup>[1-4]</sup>

| Raman shift (cm <sup>-1</sup> ) | vibrational assignment                                             |
|---------------------------------|--------------------------------------------------------------------|
| 993                             | B–O symmetric stretching                                           |
| 1070                            | C–H in-plane deformation coupled with<br>C–S stretching vibrations |
| 1582                            | C=C stretching vibrations                                          |
| 2222                            | C≡N stretching vibration                                           |

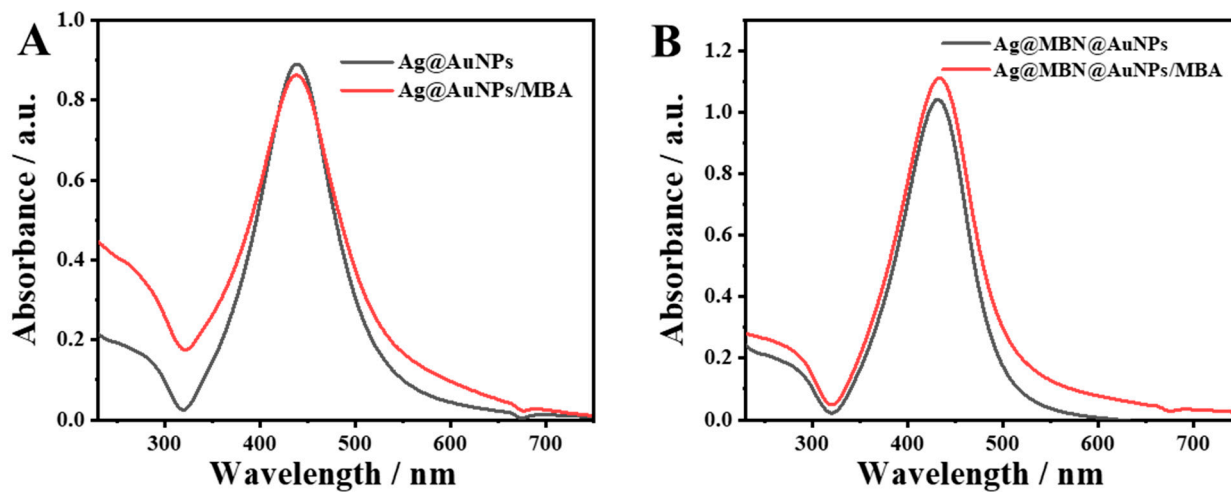

Figure S6. UV-vis spectra of (A) Ag@AuNPs and (B) Ag@MBN@AuNPs before and after modified by MBA

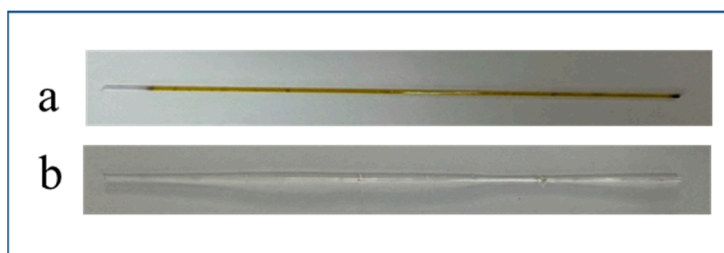

Figure S7. Photographs of aminosilylated capillary treated with Ag@AuNPs (a) and raw capillary treated with Ag@AuNPs (b).

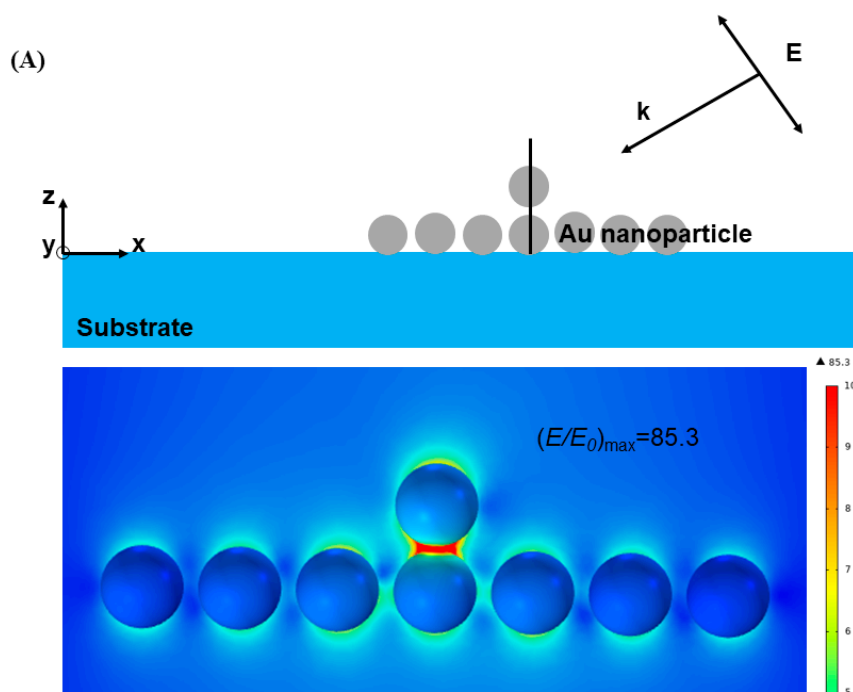

Figure S8 Simulated near-field electromagnetic field distributions of the SERS sensing platform. The distance between the SERS tags and the Ag@AuNPs-layer is about 2 nm calculating based on the molecular structure.

Note: The simulations were performed using the COMSOL software to obtain electric field distributions under 60 deg oblique incidence. Total-field scattered-field source is employed in the simulation. The excitation wavelength was set at 532 nm with the electric field polarized along the x-axis. The complex dielectric constants of the materials were obtained from the database of Johnson-Christy (The Ag@AuNPs were assumed to be Au, and the

size was set to be 46 nm) and Palik (SiO<sub>2</sub>, substrate), respectively, perfectly matched layer was used in both three directions and a mesh size of 1.5 nm for the structure region was utilized.

## References

1. He X. N.; Wang Y. N.; Wang Y.; Xu Z. R. Accurate quantitative detection of cell surface sialic acids with a background-free SERS probe, *Talanta*, **2020**, *209*, 120579.
2. Muhammad P.; Tu X. Y.; Liu J.; Wang Y. J.; Liu Z. Molecularly imprinted plasmonic substrates for specific and ultrasensitive immunoassay of trace glycoproteins in biological samples, *ACS Appl. Mater. Interfaces*, **2017**, *9*, 12082-12091.
3. Ma S. S.; Li Q.; Yin Y. M.; Yang J.; Liu D. B. Interference-free surface-enhanced Raman scattering tags for single-cell molecular imaging with a high signal-to-background ratio, *small*, **2017**, *13*, 1603340.
4. Peng R. Y.; Si Y. M.; Deng T.; Zheng J.; Li J. S.; Yang R. H.; Tan W. H. A novel SERS nanoprobe for the ratiometric imaging of hydrogen peroxide in living cells, *Chem. Commun.*, **2016**, *52*, 8553-8556.
